# Supplementary material for: A Mobile Element in mutS Drives Hypermutation in a Marine Vibrio
Source: PubMed Central journal article supplement (PMC5296598; doi:10.1128/mbio.02045-16), 2017-02-07

**a**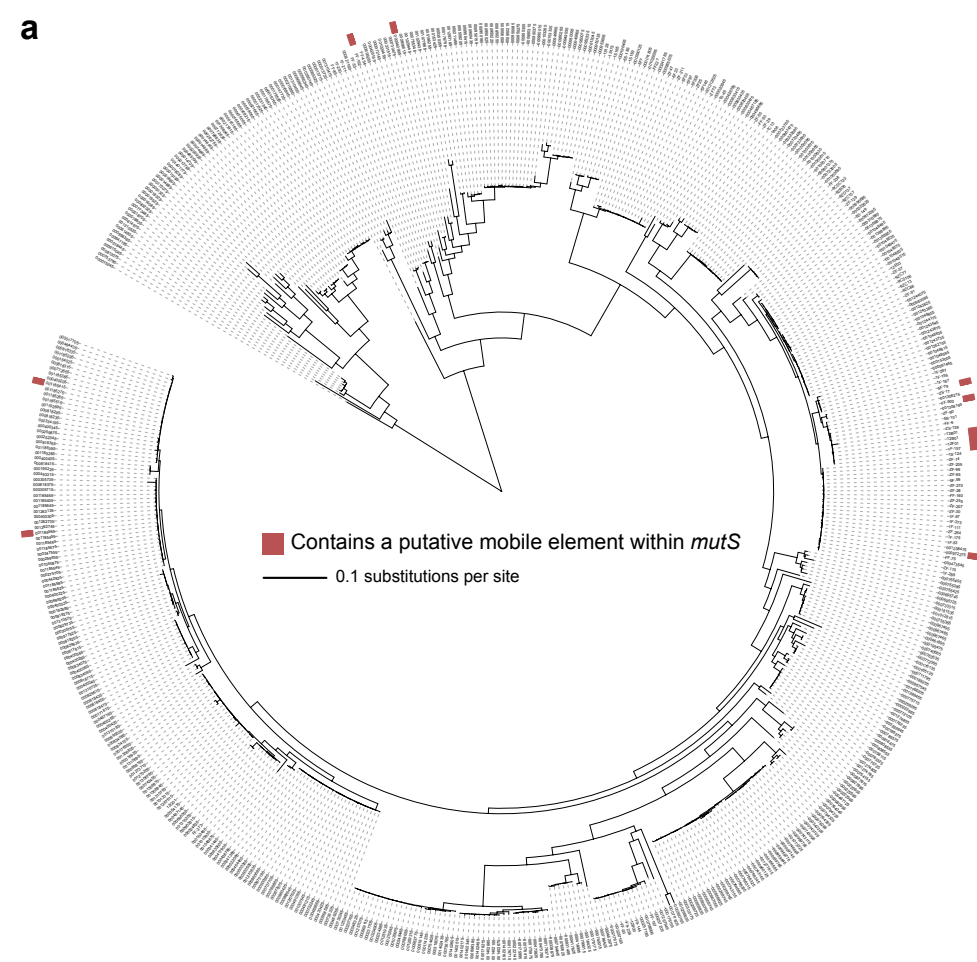**b**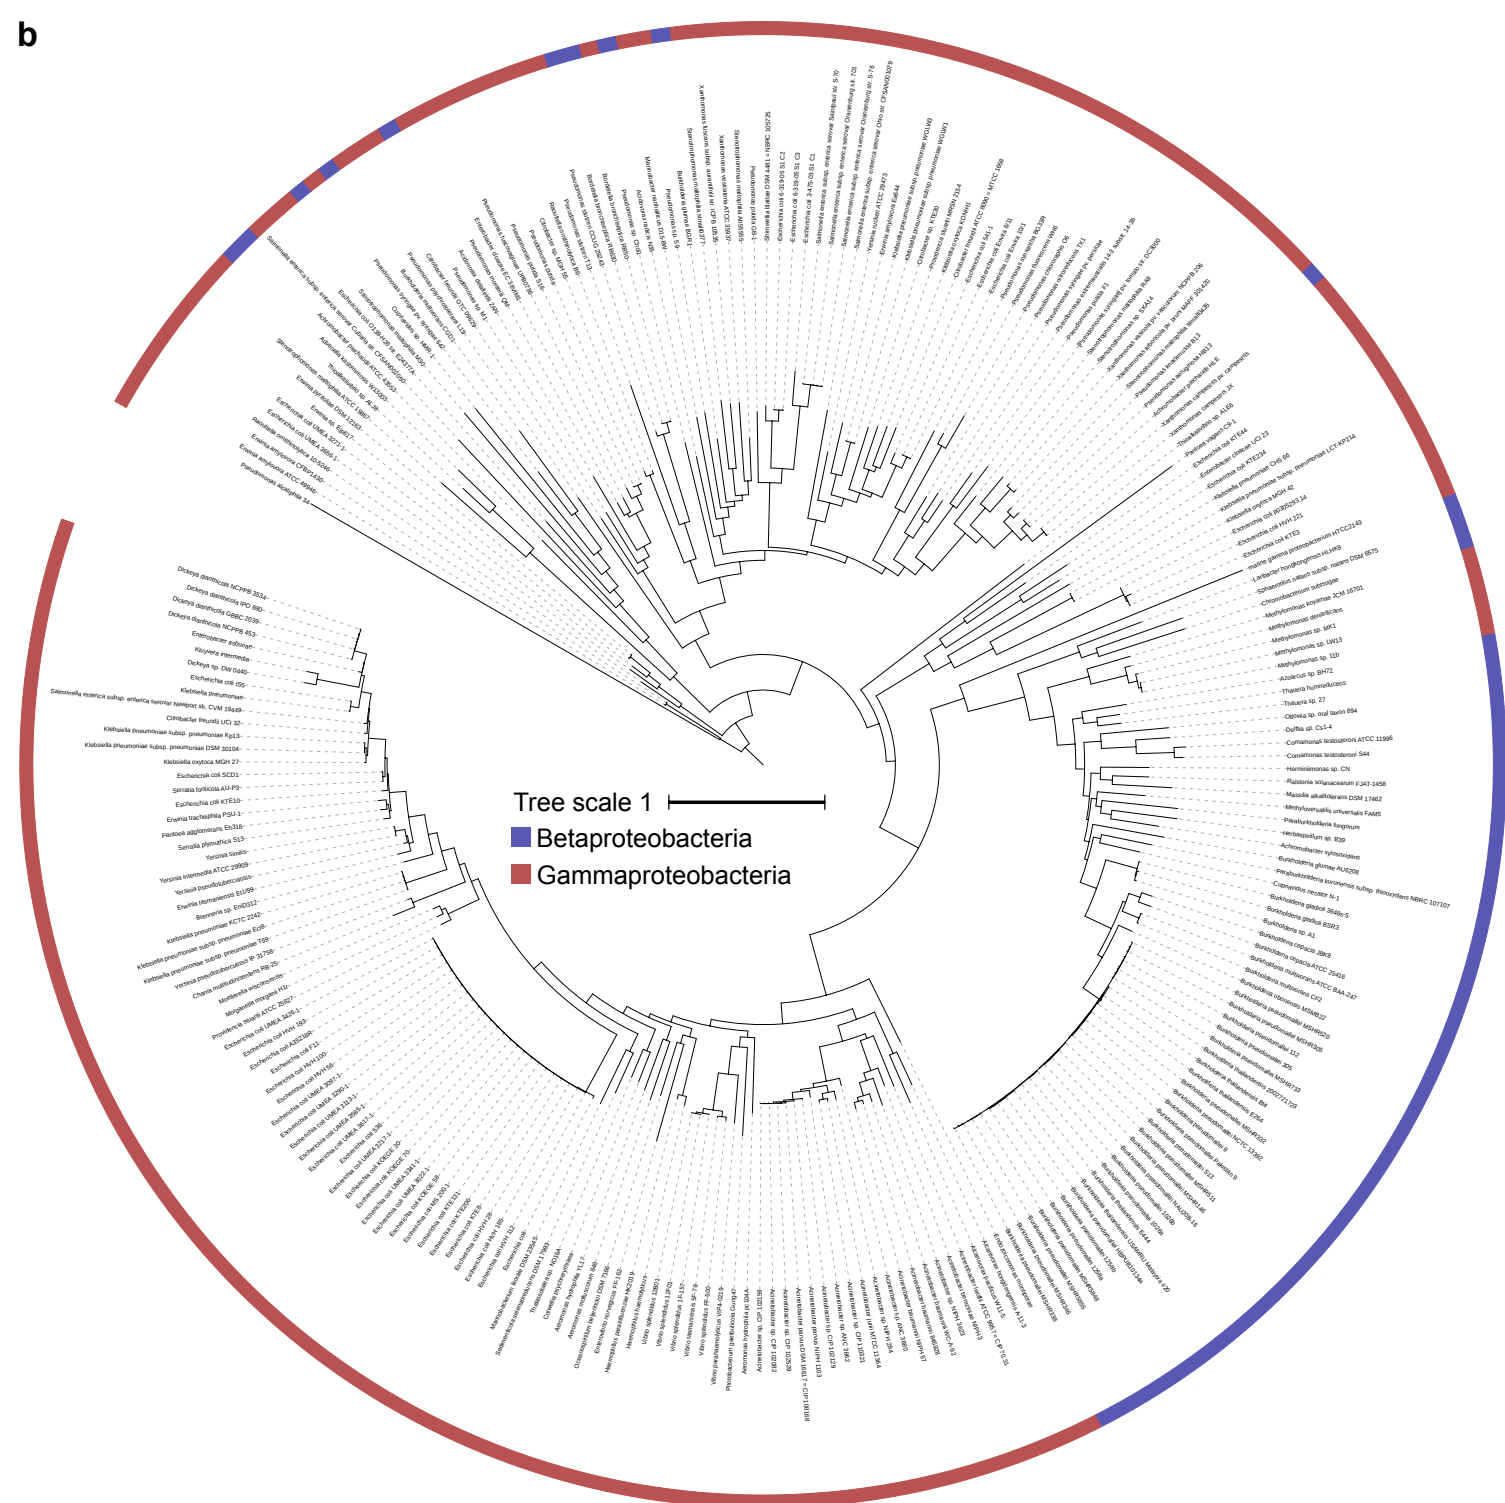**c**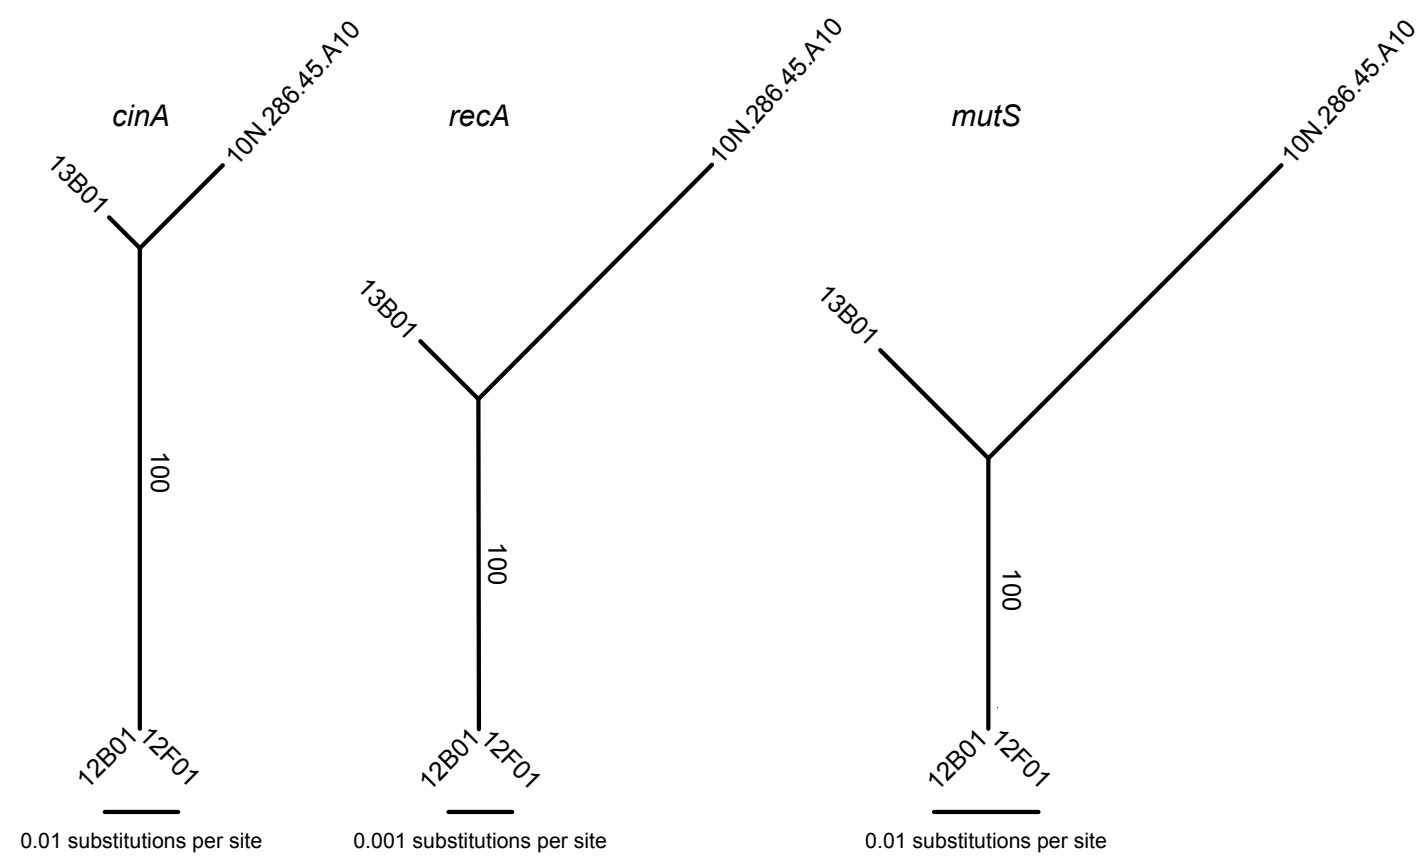

Supplement: mbo001163141sf3.pdf [file mbo001163141sf3.pdf]
